# Supplementary material
Source: PubMed Central journal article supplement (PMC5599222)
Supplement: NIHMS903897-supplement-3.pdf [file NIHMS903897-supplement-3.pdf]

**A**

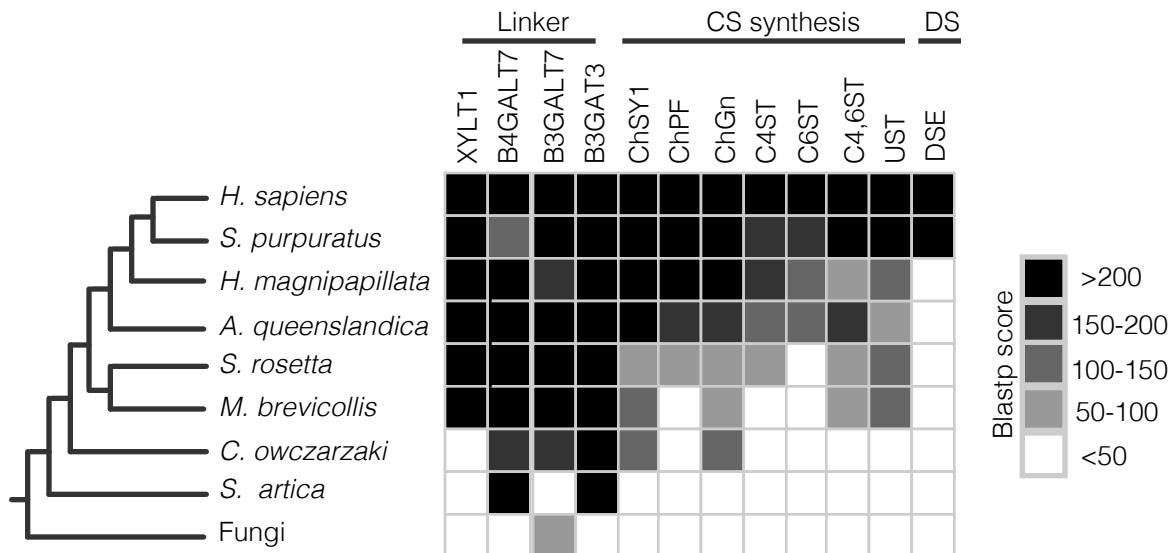

**B**

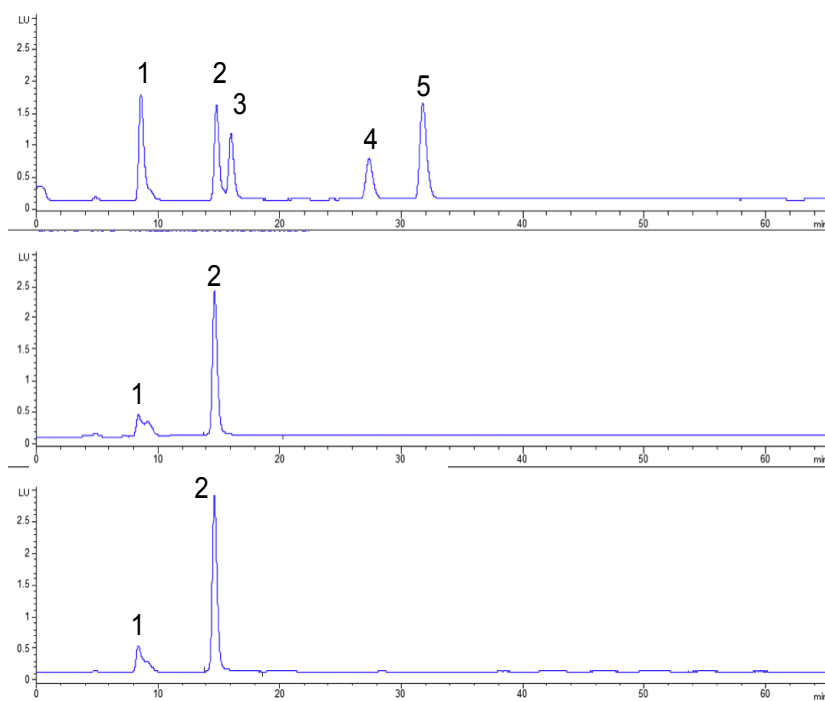

**C**

| CS        | Chondroitinase ABC |         | EroS  |         |
|-----------|--------------------|---------|-------|---------|
|           | µg                 | % total | µg    | % total |
| (1) D0a0  | 12.25              | 20      | 11.57 | 16      |
| (2) D0a6  | 50.45              | 80      | 60.96 | 84      |
| (3) D0a4  | n.d.               |         | n.d.  |         |
| (4) D0a10 | n.d.               |         | n.d.  |         |
| (5) D2a4  | n.d.               |         | n.d.  |         |
| Total CS  | 62.69              | 100     | 72.50 | 100     |

**D**

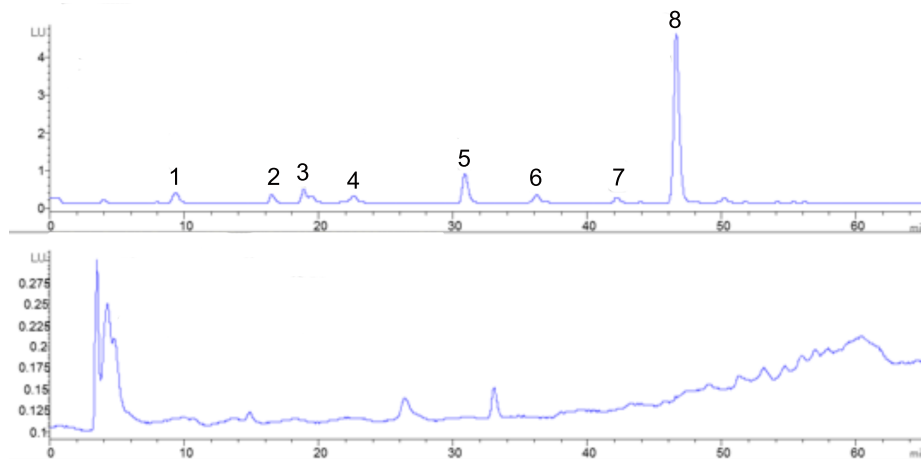

**E**

| DS       | Heparinase I,II,III |  |
|----------|---------------------|--|
|          | µg                  |  |
| (1) D0A0 | n.d.                |  |
| (2) D0S0 | n.d.                |  |
| (3) D0A6 | n.d.                |  |
| (4) D2A0 | n.d.                |  |
| (5) D0S6 | n.d.                |  |
| (6) D2S0 | n.d.                |  |
| (7) D2A6 | n.d.                |  |
| (8) D2S6 | n.d.                |  |
