# Supplementary material
Source: PubMed Central journal article supplement (PMC5599222)
Supplement: NIHMS903897-supplement-8.pdf [file NIHMS903897-supplement-8.pdf]

**Table S1. Related to Figure 2. Bacteria tested in swarming bioassay.**

| Species                        | Strain                                       | Genotype                    | Live bacteria | Conditioned media | Concentrated conditioned media | Accession information |
|--------------------------------|----------------------------------------------|-----------------------------|---------------|-------------------|--------------------------------|-----------------------|
| <i>Vibrio fischeri</i>         | ES114                                        | WT                          | +             | +                 | +                              | ATCC 700601           |
|                                |                                              | $\Delta$ LuxO               | +             | +                 | +                              | Lupp et al. 2003      |
|                                |                                              | $\Delta$ AinS               | +             | +                 | +                              | Lupp et al. 2003      |
|                                |                                              | $\Delta$ LuxI               | +             | +                 | +                              | Lupp et al. 2003      |
|                                |                                              | $\Delta$ AinS $\Delta$ LuxS | +             | +                 | +                              | Lupp and Ruby 2005    |
|                                |                                              | $\Delta$ LuxR               | +             | +                 | +                              | Lupp and Ruby 2005    |
|                                |                                              | $\Delta$ SypC               | +             | +                 | +                              | Shibata et al. 2012   |
|                                |                                              | $\Delta$ SypH               | +             | +                 | +                              | Shibata et al. 2012   |
|                                |                                              | $\Delta$ SypI               | +             | +                 | +                              | Shibata et al. 2012   |
|                                |                                              | $\Delta$ SypK               | +             | +                 | +                              | Shibata et al. 2012   |
|                                |                                              | $\Delta$ SypM               | +             | +                 | +                              | Shibata et al. 2012   |
|                                |                                              | $\Delta$ SypO               | +             | +                 | +                              | Shibata et al. 2012   |
|                                |                                              | $\Delta$ SypQ               | +             | +                 | +                              | Shibata et al. 2012   |
| <i>Vibrio fischeri</i>         | MJ11                                         |                             | +             | +                 | +                              | BAA-1741              |
| <i>Vibrio tubiashii</i>        |                                              |                             | +             | +                 | +                              | ATCC 19105            |
| <i>Vibrio orientalis</i>       |                                              |                             | +             | +                 | +                              | ATCC 33934            |
| <i>Vibrio harveyi</i>          |                                              |                             | –             | –                 | –                              | ATCC 14126            |
| <i>Vibrio natriegens</i>       |                                              |                             | –             | –                 | –                              | ATCC 8110             |
| <i>Vibrio parahaemolyticus</i> |                                              |                             | Ψ             | Ψ                 | Ψ                              | ATCC 17802            |
| <i>Vibrio alginolyticus</i>    |                                              |                             | Ψ             | Ψ                 | Ψ                              | PRJNA13571            |
| <i>Vibrio anguillarum</i>      |                                              |                             | –             | –                 | –                              | ATCC 19181            |
| <i>Vibrio ordalii</i>          |                                              |                             | –             | –                 | –                              | ATCC 33509            |
| <i>Vibrio cholerae</i>         | YB1A01                                       |                             | n.t.          | –                 | –                              | PRJNA281423           |
| <i>Vibrio metoecus</i>         | YB4D01                                       |                             | –             | –                 | –                              | PRJNA281423           |
| <i>Vibrio mimicus</i>          |                                              |                             | –             | –                 | –                              | ATCC 33653            |
| <i>Echinicola pacifica</i>     |                                              |                             | –             | –                 | –                              | DSM 19836             |
| <i>Echinicola pacifica</i>     | From starved<br><i>S. rosetta</i> co-culture |                             | n.t.          | –                 | –                              | ATCC PRA-390          |

+ : swarming observed; – : no swarming observed; Ψ : settling observed; n.t.: not tested

**Table S2. Related to Figure 2. Purified molecules tested in swarming bioassay.**

| <b>Molecule</b>                          | <b>Induces Swarming?</b> | <b>Source</b>                              |
|------------------------------------------|--------------------------|--------------------------------------------|
| 3-O-C <sub>6</sub> -(L)-HSL              | –                        | Cayman Chemical (10011207)                 |
| C8-HSL                                   | –                        | Cayman Chemical (10011199)                 |
| Cyclic di-GMP                            | –                        | Sigma SML1228                              |
| Chondroitinase ABC                       | +                        | Proteus vulgaris (Sigma C3667)             |
| Chondroitinase AC                        | +                        | Flavobacterium heparinum (Sigma C2780)     |
| Chondroitinase B                         | –                        | Flavobacterium heparinum (Sigma C8058 )    |
| Heparinase I and III                     | –                        | Flavobacterium heparinum (Sigma H3917 )    |
| Hyaluronate lyase                        | –                        | Staphylococcus hyalurolyticus (Sigma H113) |
| Chitinase                                | –                        | Streptomyces griseus (Sigma C9830)         |
| O-Glycosidase                            | –                        | Streptococcus pneumonia (Sigma G1163)      |
| Lysozyme                                 | –                        | Sigma L67876                               |
| Collagenase                              | –                        | Clostridium histolyticum (Sigma C0130)     |
| Unsulphated chondroitin                  | –                        | Sigma C3920                                |
| Chondroitin-6-sulfate                    | –                        | Sigma C4170                                |
| Chondroitin sulfate<br>(shark cartilage) | –                        | Sigma C4384                                |

**Table S3. Related to Figure 3. Chondroitinase-induced mating in *S. rosetta***

| <b>Inducing factor</b>                                     | <b># clonal isolates</b> | <b>% thecate isolates<br/>(presumably diploid)</b> | <b>% outcrossed diploid<br/>isolates</b> |
|------------------------------------------------------------|--------------------------|----------------------------------------------------|------------------------------------------|
| <i>E. pacifica</i> conditioned<br>media (5% vol/vol)       | 88                       | 0                                                  | 0                                        |
| EroS<br>( <i>V. fischeri</i> , 50pM)                       | 53                       | 17%                                                | 15%                                      |
| Chondroitinase ABC<br>( <i>P. vulgaris</i> , 0.0035 units) | 62                       | 21%                                                | 17%                                      |
| Chondroitinase AC<br>( <i>F. heparinum</i> , 0.0035 units) | 52                       | 13%                                                | 11%                                      |

**Table S4. Related to Figure S4. Quantification of EroS secreted by *V. fischeri*.**

|                                              | Purified EroS | Low nutrient media | High nutrient media |
|----------------------------------------------|---------------|--------------------|---------------------|
| MS2 Peak intensity (sequence TQITDDTYQNFFDK) | 1.43E+05      | 9.08E+02           | 2.77E+03            |
| MS2 Peak intensity (1 pMol standard)         | 1.07E+04      | 2.24E+04           | 1.86E+04            |
| pMol EroS in excised gel band                | 13.4          | 0.0405             | 0.149               |
| Sample volume in gel band ( $\mu$ L)         | 2.0           | 18.0               | 6.0                 |
| [EroS] loaded on gel                         | 6.7 $\mu$ M   | 2.3 nM             | 25 nM               |
| [EroS] in culture supernatant                |               | 6.8 pM             | 75 pM               |

**Table S5. Related to Figure S4. *Vibrio*-induced swarming is not observed in other tested choanoflagellate species**

|                              | <u><i>V. fischeri</i></u> |                   |      | <u><i>V. tubiashii</i></u> |                   | <u><i>V. orientalis</i></u> |                   | <u><i>P. vulgaris</i></u> |
|------------------------------|---------------------------|-------------------|------|----------------------------|-------------------|-----------------------------|-------------------|---------------------------|
| Choanoflagellate species     | Live bacteria             | Conditioned media | EroS | Live bacteria              | Conditioned media | Live bacteria               | Conditioned media | ABC chondroitinase        |
| <b><i>S. rosetta</i></b>     | +                         | +                 | +    | +                          | +                 | +                           | +                 | +                         |
| <b><i>S. roanoaka</i></b>    | -                         | -                 | -    | -                          | -                 | -                           | -                 | -                         |
| <b><i>S. infusionum</i></b>  | -                         | -                 | -    | -                          | -                 | -                           | -                 | -                         |
| <b><i>S. minuta</i></b>      | -                         | -                 | -    | -                          | -                 | -                           | -                 | -                         |
| <b><i>S. pyxidium</i></b>    | -                         | -                 | -    | -                          | -                 | -                           | -                 | -                         |
| <b><i>M. brevicollis</i></b> | -                         | -                 | -    | -                          | -                 | -                           | -                 | -                         |

+: swarming observed; -: no swarming observed
