# Supplementary material
Source: PubMed Central journal article supplement (PMC5599222)

A

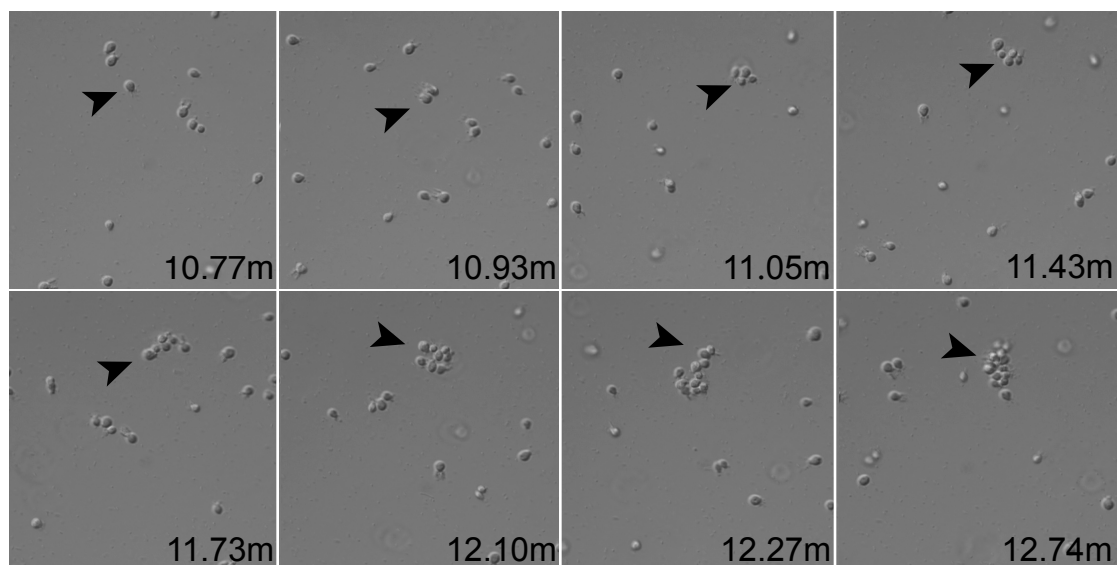

B

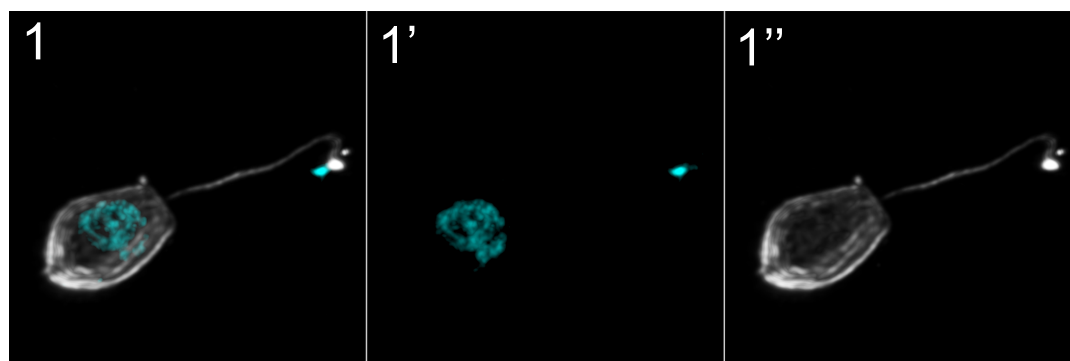

Supplement: NIHMS903897-supplement-1.pdf [file NIHMS903897-supplement-1.pdf]

**A**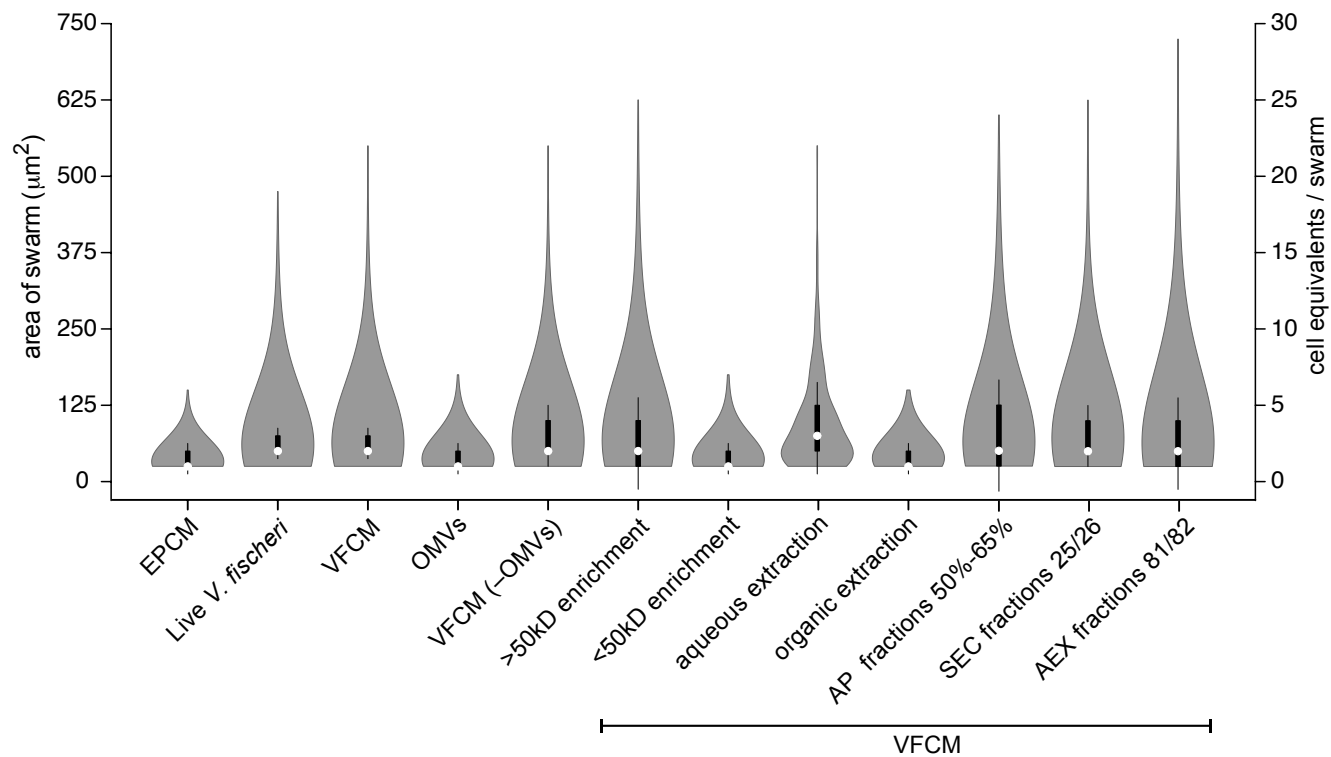**B**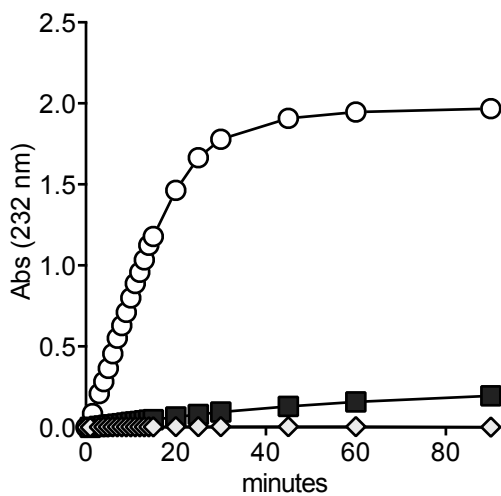**C**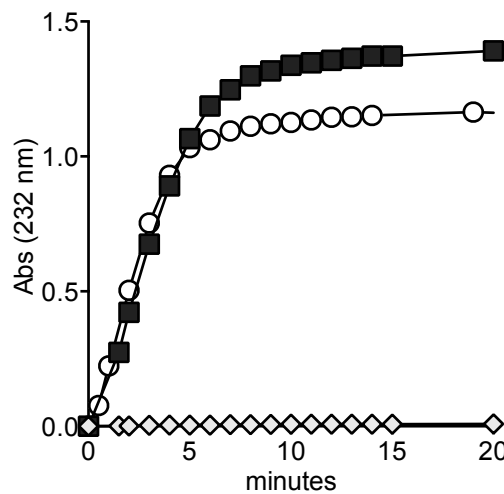**D**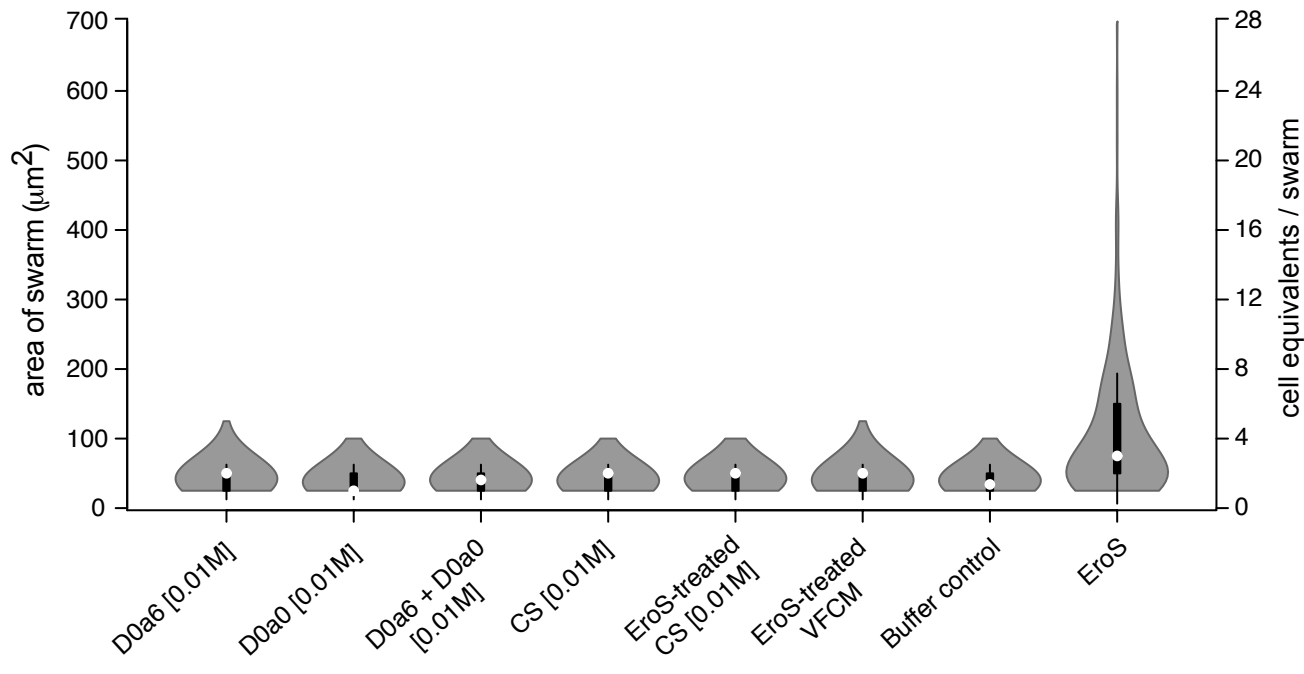

Supplement: NIHMS903897-supplement-2.pdf [file NIHMS903897-supplement-2.pdf]
